# Supplementary material
Source: PubMed Central journal article supplement (PMC1459234)
Supplement: pbio.0040138.sg005.pdf [file pbio.0040138.sg005.pdf]

## Branco, Figure S5

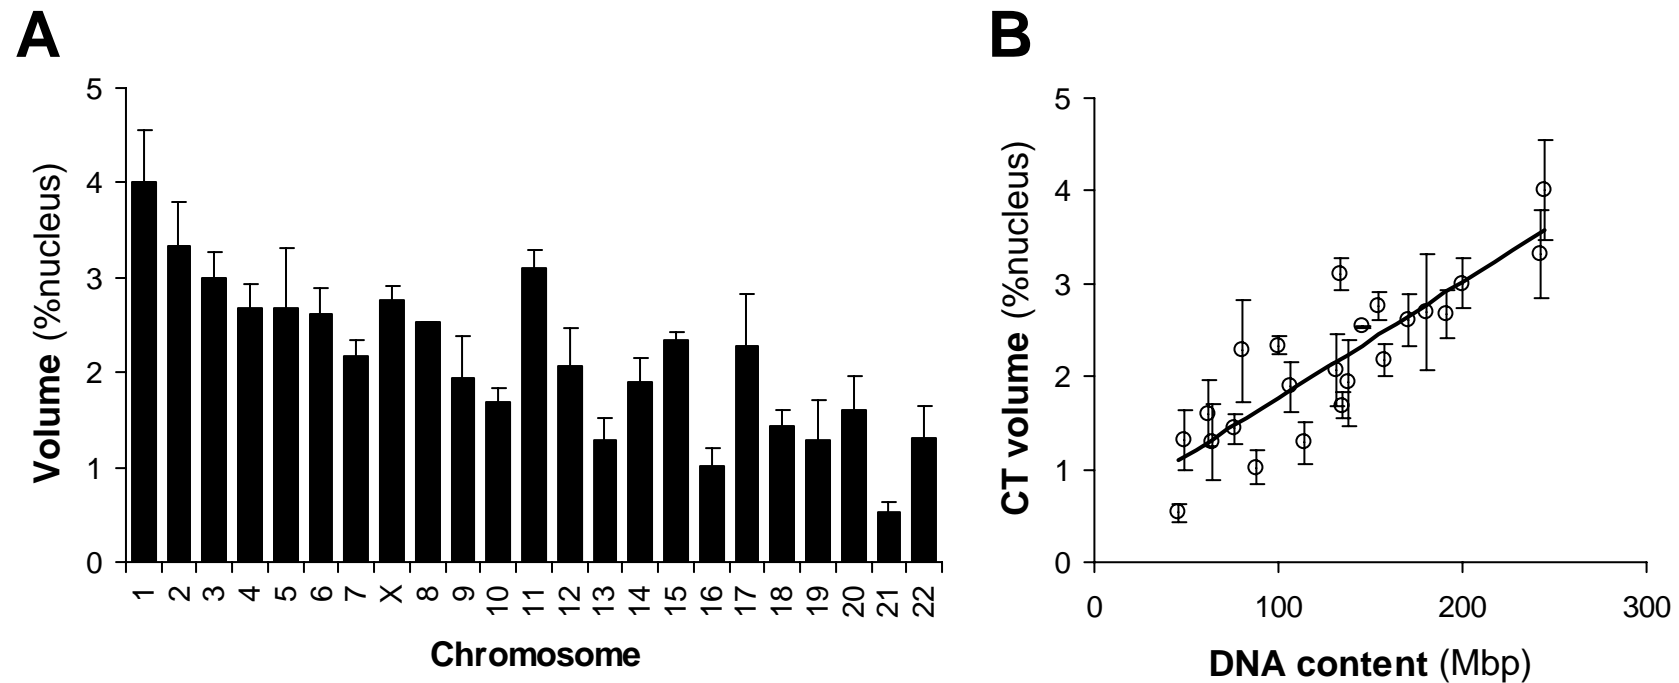

Figure S5. Volumes for all human female CTs in lymphocytes and correlation with DNA content. CT volumes were measured (**A**) and plotted against their respective DNA content (**B**). Despite the good correlation, there are significant deviations from the regression line in several data points, which results in distinct DNA compaction ratios for different CTs.
