# Supplementary material
Source: PubMed Central journal article supplement (PMC1459234)
Supplement: pbio.0040138.st001.pdf [file pbio.0040138.st001.pdf]

## Branco, Table S1

Table S1. Interchange yields in phytohemagglutinin-activated human lymphocytes. Arsuaga and colleagues [26] measured interchange yields in activated human lymphocytes after treatment with ionizing radiation and M-FISH analysis. Original values were recalculated here as a percentage of the total number of metaphases analyzed (n=3585). Intermingling volumes were measured (in the same cell type) for pairs of chromosomes that span the range of frequencies (0.08 – 1.23%; highlighted in red).

[illegible]
